# Supplementary material
Source: MDPI journal article supplement (https://www.mdpi.com/2073-4395/13/1/271)
Supplement: s1 [file s1]

# Integrating Diverse Cover Crops for Fallow Replacement in a Subtropical Dryland: Implications on Subsequent Cash Crop Yield, Grain Quality, and Gross Margins

## Supplementary materials

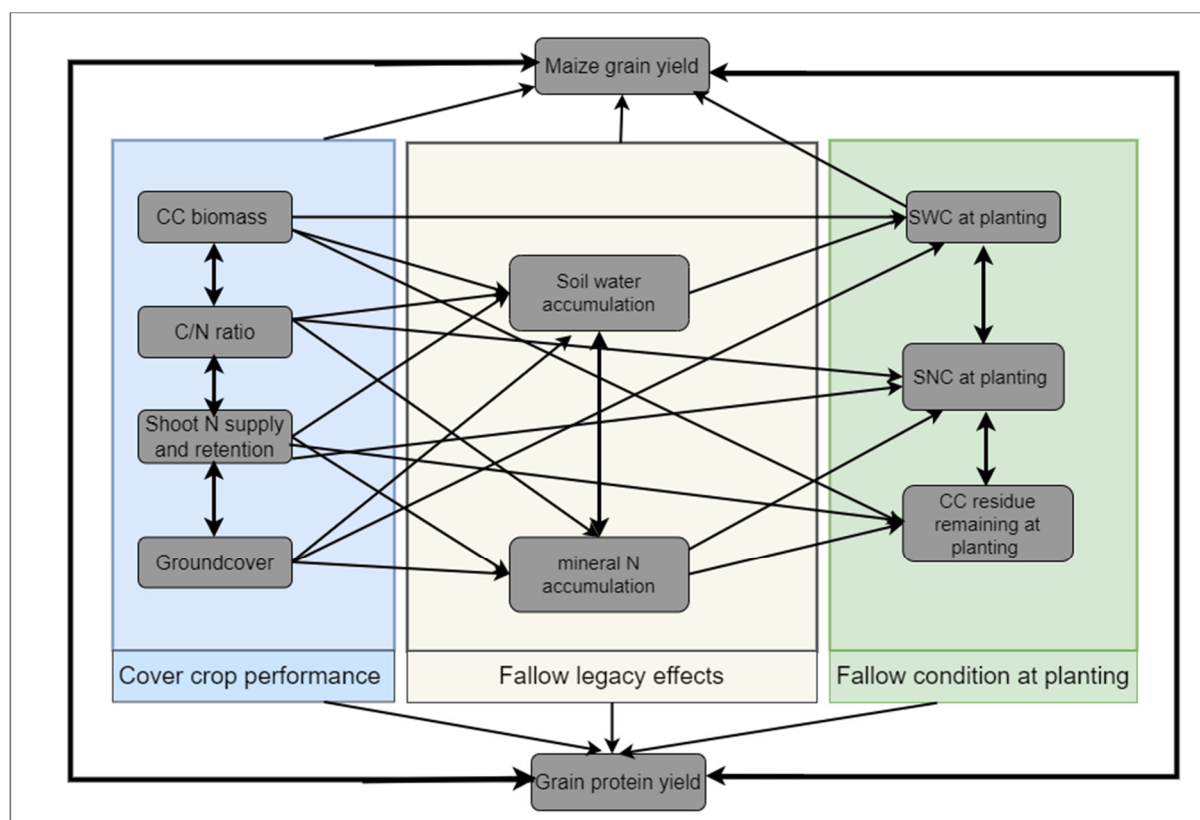

Figure S1: The *a priori* conceptual framework articulating the proposed causal influences of cover crops on subsequent cash crop grain and protein yield based on the hypothesis that cash crop productivity (grain yield and protein content) is influenced by cover crop performance, and fallow as well as through direct and indirect effects on fallow soil water (SWC) and mineral N dynamics (SNC).

**Table S1.** Price and costs of commodities, stubble, seeds, operations, and chemicals used for the calculation of farm gross margin

[illegible]

[illegible]

[illegible]

**Table S2.** Parameter estimates from the final SEM model.

| Dep  | Pred | Estimate | SE     | $\beta$ | z       | p     |
|------|------|----------|--------|---------|---------|-------|
| MCGY | CCDM | 1.0836   | 0.4229 | 1.0723  | 2.5625  | 0.01  |
| MCGY | CCNC | 0.3003   | 0.244  | 0.2972  | 1.2306  | 0.218 |
| MCGY | CNRT | 0.5496   | 0.1338 | 0.5439  | 4.1076  | <.001 |
| MCGY | NSNR | -0.6157  | 0.4165 | -0.6093 | -1.4783 | 0.139 |
| MCGY | EPAW | 0.3993   | 0.1097 | 0.3951  | 3.6386  | <.001 |
| MCGY | ESMN | 0.0807   | 0.1885 | 0.0798  | 0.428   | 0.066 |
| MCGY | SNAC | 0.2367   | 0.1865 | 0.2342  | 1.2688  | 0.205 |
| MCGY | SWAC | 0.1127   | 0.1124 | 0.1115  | 1.0024  | 0.061 |
| MCGY | DMRE | -0.5454  | 0.1153 | -0.5397 | -4.7297 | <.001 |
| EPAW | CCDM | -0.3227  | 0.507  | -0.3227 | -0.6365 | 0.524 |
| EPAW | CCNC | -0.4057  | 0.3112 | -0.4057 | -1.3039 | 0.192 |
| EPAW | CNRT | -0.1764  | 0.1793 | -0.1764 | -0.9835 | 0.325 |
| EPAW | NSNR | 0.2961   | 0.5157 | 0.2961  | 0.5741  | 0.566 |
| EPAW | SWAC | 0.4861   | 0.1295 | 0.4861  | 3.7547  | <.001 |
| EPAW | ESMN | 0.013    | 0.1722 | 0.013   | 0.0753  | 0.94  |
| ESMN | CCDM | -0.3686  | 0.2961 | -0.0686 | -0.3686 | 0.081 |
| ESMN | CCNC | -0.0207  | 0.1813 | -0.0207 | -0.1144 | 0.909 |
| ESMN | CNRT | -0.0866  | 0.101  | -0.0866 | -0.8572 | 0.391 |
| ESMN | NSNR | 0.153    | 0.3023 | 0.153   | 0.5059  | 0.613 |
| ESMN | SNAC | 0.8143   | 0.0815 | 0.8143  | 9.989   | <.001 |
| ESMN | SWAC | 0.0255   | 0.0759 | 0.0255  | 0.3363  | 0.737 |
| SWAC | CCDM | -0.337   | 0.5693 | -0.337  | -0.592  | 0.554 |
| SWAC | CCNC | -0.0372  | 0.3514 | -0.0372 | -0.1059 | 0.916 |
| SWAC | CNRT | -0.0723  | 0.187  | -0.0723 | -0.3863 | 0.699 |
| SWAC | NSNR | 0.2153   | 0.5845 | 0.2153  | 0.3683  | 0.713 |
| SNAC | CCDM | 0.8194   | 0.5302 | 0.8194  | 1.5455  | 0.122 |
| SNAC | CCNC | 0.4084   | 0.3273 | 0.4084  | 1.248   | 0.212 |
| SNAC | CNRT | -0.402   | 0.1742 | -0.402  | -2.3077 | 0.021 |
| SNAC | NSNR | -0.7415  | 0.5444 | -0.7415 | -1.3621 | 0.173 |
| DMRE | CCDM | 1.4948   | 0.4691 | 1.4948  | 3.1864  | 0.001 |
| DMRE | CCNC | 0.4058   | 0.2896 | 0.4058  | 1.4014  | 0.161 |
| DMRE | CNRT | 0.0172   | 0.1541 | 0.0172  | 0.1117  | 0.911 |
| DMRE | NSNR | -1.1483  | 0.4817 | -1.1483 | -2.3839 | 0.017 |

MCGY = cash crop grain yield ( $\text{kg ha}^{-1}$ ); MCBY = cash crop biomass yield ( $\text{kg ha}^{-1}$ ); MCWE = cash crop water use efficiency ( $\text{kg ha}^{-1} \text{ m}^{-1}$ ); GRMN = farm gross margin ( $\text{\$ ha}^{-1}$ ); MCPR = cash crop grain protein (%); CCDM = cover crop biomass ( $\text{kg DM ha}^{-1}$ ); CCNC = biomass N concentration (%); CNRT = biomass C/N ratio; NSNR = Biomass retention and supply ( $\text{kg N ha}^{-1}$ ); EPAW = soil water at end of fallow (mm); SWAC = soil water accumulation between cover crop termination and cash crop sowing (mm); FAEF = fallow efficiency (%); ESMN = soil mineral N content at cash crop sowing ( $\text{kg N ha}^{-1}$ ); SNAC = soil mineral N between cover crop termination and cash crop sowing ( $\text{kg N ha}^{-1}$ ); and DMRE = cover crop residue remaining at cash crop sowing (%).
